# Supplementary material for: Current Status of Genetic Counselling for Rare Diseases in Spain
Source: MDPI journal article supplement (doi:10.3390/diagnostics11122320), 2021-12-09
Supplement: s1 [file s1]

**Supplementary Table S1.** Core competences of Genetic Counsellors adapted from the European Board of Medical Genetics (EBMG) recommendations.

|                                  | Competence                                                                                                                                                                                                                                                                                                                                   | Tasks                                                                                                                                                                                                                                                                                                                                                                                                                                                                        |
|----------------------------------|----------------------------------------------------------------------------------------------------------------------------------------------------------------------------------------------------------------------------------------------------------------------------------------------------------------------------------------------|------------------------------------------------------------------------------------------------------------------------------------------------------------------------------------------------------------------------------------------------------------------------------------------------------------------------------------------------------------------------------------------------------------------------------------------------------------------------------|
| COUNSELLOR-CLIENT RELATIONSHIP   | 1. Establish relationship and clarify clients' concerns and expectations.                                                                                                                                                                                                                                                                    | 1.1 Creating environment for expression of feelings, anxieties, beliefs, and expectations considering clients' experiences.<br>1.2 Identifying client needs.<br>1.3 Enabling clients to make informed choices about the implications of their family history.<br>1.4 Taking appropriate action to meet identified needs with the agreement of the client.                                                                                                                    |
|                                  | 2. Make appropriate and accurate genetic risk assessment.                                                                                                                                                                                                                                                                                    | 2.1 Identifying sufficient medical, family and personal information to make appropriate genetic risk assessment.<br>2.2 Ascertaining medical information from other sources to confirm family information and diagnosis.<br>2.3 Understanding inheritance patterns and the underlying mechanisms by which genetic disease may occur.                                                                                                                                         |
|                                  | 3. a. Convey clinical and genetic information to clients<br>3. b. Explain options available including risks, benefits and limitations.<br>3. c. Evaluate the understanding of the individual related to the topics being discussed.<br>3. d. Acknowledge the implications of individual and family experiences, beliefs, values and culture. | 3.1 Providing information about the genetic disorder appropriate to the client's needs, reflecting their values, religious and cultural beliefs and preferences.<br>3.2 Providing information based upon appropriate interpretation of genetic and clinical knowledge.<br>3.3. Communicating with respect to the genetic risk assessment and possible options.<br>3.4 Supporting dissemination of information about the genetic disorder to at risk relatives by the client. |
|                                  | 4. Make an assessment of clients' needs and resources and provide support, ensuring referral to other agencies as appropriate.                                                                                                                                                                                                               | 4.1 Ascertaining psychological needs of the individual or family.<br>4.2 Respecting clients' preferences, providing support and making referrals to other agencies.<br>4.3 Identifying and supporting clients' access to local, regional and national resources and services.                                                                                                                                                                                                |
|                                  | 5. Use of a range of counselling skills to facilitate clients' adjustment and decision-making.                                                                                                                                                                                                                                               | 5.1 Using safe, effective and appropriate counselling skills to support clients to make adjustments and decisions.                                                                                                                                                                                                                                                                                                                                                           |
| MANAGEMENT AND ORGANIZATION      | 6. Document information including case notes and correspondence in an appropriate manner.                                                                                                                                                                                                                                                    | 6.1 Systematical collection and maintenance of comprehensive and accurate records detailing any intervention.<br>6.2 Maintaining confidentiality and security of written and verbal information.                                                                                                                                                                                                                                                                             |
|                                  | 7. Find and utilize relevant medical and genetic information for use in Genetic Counselling.                                                                                                                                                                                                                                                 | 7.1 Collecting, evaluating and using relevant information about the genetic disorder in question.<br>7.2 Critically assessing current evidence to inform practice and professional development.<br>7.3 Disseminating evidence of good practice and service improvement through verbal and written media.                                                                                                                                                                     |
|                                  | 8. Demonstrate ability to organize and prioritize a case load.                                                                                                                                                                                                                                                                               | 8.1 Addressing client needs in a sensitive and fair manner making best use of resources available.<br>8.2 Prioritizing according to patient needs.                                                                                                                                                                                                                                                                                                                           |
|                                  | 9. Plan, organize and deliver professional and public education                                                                                                                                                                                                                                                                              | 9.1 Explaining of how genetics impacts on affected individuals, their families, partners and carers.<br>9.2 Seeking to raise awareness of available services and resources related to genetic healthcare.<br>9.3 Acting as a resource for other professionals and lay groups.                                                                                                                                                                                                |
| PROFESSIONAL PRACTICE AND ETHICS | 10. Establish effective working relationships to function within a multi-disciplinary team and as part of the wider health and social care network.                                                                                                                                                                                          | 10.1 Promoting patient-centered care in partnership with the client, their family, and appropriate care providers.<br>10.2 Facilitating communication via a strong multidisciplinary network of professional and lay colleagues.<br>10.3 Coordinating patient and family care as appropriate.                                                                                                                                                                                |
|                                  | 11. Contribute to the development and organization of genetic services.                                                                                                                                                                                                                                                                      | 11.1 Evaluating own practice and that of others in the light of new evidence and modifying practice if necessary.<br>11.2 Using critical skills to consider how new evidence may improve service organization and delivery.                                                                                                                                                                                                                                                  |

|                             |                                                                                                                              |                                                                                                                                                                                                                                                                                                                                                                                                                                                                                             |
|-----------------------------|------------------------------------------------------------------------------------------------------------------------------|---------------------------------------------------------------------------------------------------------------------------------------------------------------------------------------------------------------------------------------------------------------------------------------------------------------------------------------------------------------------------------------------------------------------------------------------------------------------------------------------|
| PROFESSIONAL<br>DEVELOPMENT |                                                                                                                              | 11.3 Actively seeking opportunities to meet with colleagues to discuss professional issues and innovations.<br>11.4 Actively seeking opportunities to collaborate with colleagues in audit and research to improve client care.                                                                                                                                                                                                                                                             |
|                             | 12. Practice in accordance with an appropriate code of ethical conduct.                                                      | 12.1 Encouraging professional standards of safe and ethical practice at all times.<br>12.2 Using professional standards of practice to evaluate own and others' performance.<br>12.3 Recognizes the duty to seek professional advice if standards of care are threatened.<br>12.4 Contributes to the debate on ethical challenges in genetic practice. 12.5 In normal circumstances discloses information about individuals to appropriate third parties only with the client's permission. |
|                             | 13. Recognize and maintain professional boundaries and limitations of own practice.                                          | 13.1 Recognizing practice limitations and demonstrating referrals to other health professionals when appropriate.<br>13.2 Consulting other health professionals when the client's needs fall outside the scope of genetic practice.<br>13.3 Referring clients to colleagues when necessary.                                                                                                                                                                                                 |
|                             | 14. Demonstrate reflective skills and personal awareness for the safety of individuals and families.                         | 14.1 Demonstrating reflective practice, which informs future clinical interactions.<br>14.2 Maintaining a portfolio recording reflection on practice.<br>14.3 Accessing counselling and/or clinical supervision to underpin and enhance practice.                                                                                                                                                                                                                                           |
|                             | 15. Present opportunities for clients to participate in research projects in a manner that facilitates informed choice.      | 15.1 Enables clients to make an informed choice on whether to participate in a research project or not.                                                                                                                                                                                                                                                                                                                                                                                     |
|                             | 16. Demonstrate continuing professional development as an individual practitioner and for the development of the profession. | 16.1 Actively seeks opportunities to update knowledge and skills, and reflects on the implications of these for own practice and that of professional colleagues.                                                                                                                                                                                                                                                                                                                           |
|                             |                                                                                                                              |                                                                                                                                                                                                                                                                                                                                                                                                                                                                                             |

**Supplementary Table S2.** Summary of the main tasks performed by the different healthcare professionals that should be involved in RD patients' management. A green tick indicates a task that is usually carried out by one professional profile and a red cross, a task that should not be performed by a particular professional profile.

| Tasks                                          | Genetic Counsellor | Clinical Geneticist | Laboratory Geneticist |
|------------------------------------------------|--------------------|---------------------|-----------------------|
| <b>Diagnosis of genetic diseases</b>           | ✗                  | ✓                   | ✓                     |
| Clinical diagnosis                             | ✗                  | ✓                   | ✗                     |
| Laboratory diagnosis                           | ✗                  | ✗                   | ✓                     |
| <b>Disease management</b>                      | ✓                  | ✓                   | ✗                     |
| Clinical management                            | ✗                  | ✓                   | ✗                     |
| Therapeutic management                         | ✓                  | ✓                   | ✗                     |
| Psychological management                       | ✓                  | ✗                   | ✗                     |
| <b>Risk assessment</b>                         | ✓                  | ✓                   | ✗                     |
| Identify relatives at risk                     | ✓                  | ✓                   | ✗                     |
| Help understanding risks                       | ✓                  | ✗                   | ✗                     |
| <b>Genetic testing</b>                         | ✓                  | ✓                   | ✓                     |
| Help understanding if necessary                | ✓                  | ✗                   | ✗                     |
| Help selecting the most appropriate test       | ✓                  | ✗                   | ✓                     |
| <b>Interpreting genetic results</b>            | ✓                  | ✗                   | ✓                     |
| Providing tools to patients to manage results  | ✓                  | ✗                   | ✗                     |
| <b>Counselling</b>                             | ✓                  | ✗                   | ✗                     |
| Empowering patients to take informed decisions | ✓                  | ✗                   | ✗                     |
| Emotional support                              | ✓                  | ✗                   | ✗                     |
